# Supplementary material for: NGF-Enhanced Vasculogenic Properties of Epithelial Ovarian Cancer Cells Is Reduced by Inhibition of the COX-2/PGE2 Signaling Axis
Source: MDPI journal article supplement (doi:10.3390/cancers11121970), 2019-12-07

# Supplementary material

## Set of original captures of western-blots

The membrane had to be cut into several segments to visualize the different proteins evaluated. Stripping was not an option due to the difficulty in visualizing some of these proteins. We present a set of original western-blot captures which were used to obtain the graphs of the manuscript.

### Membrane segments and captures

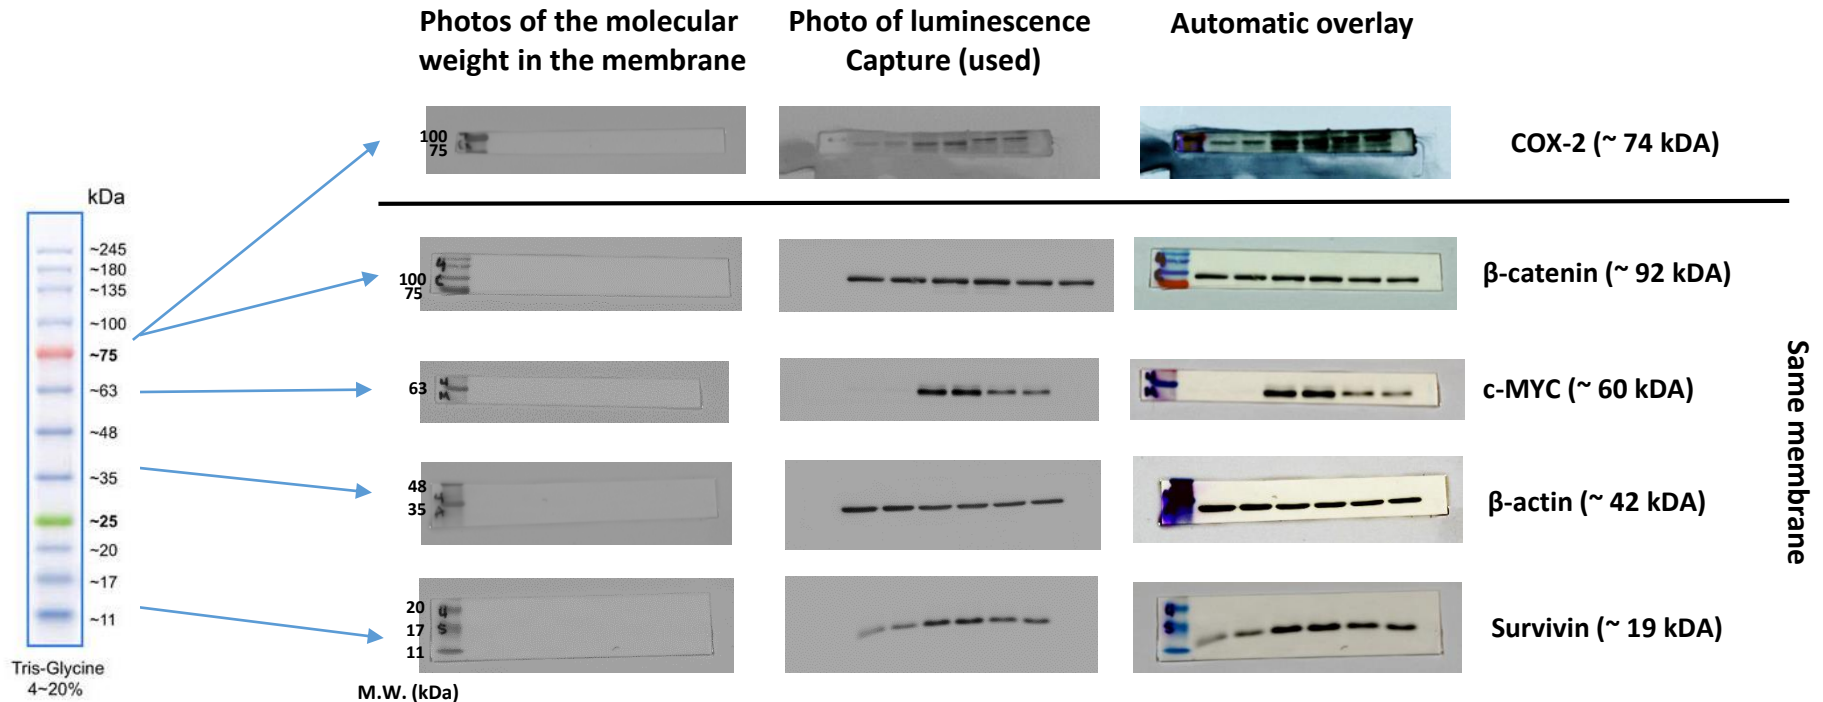

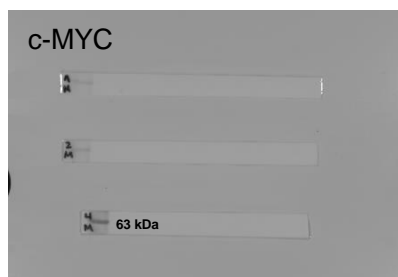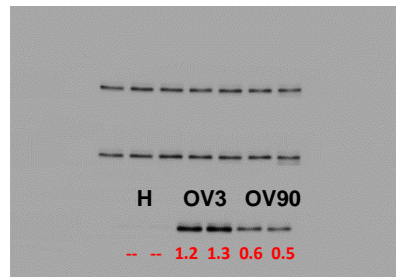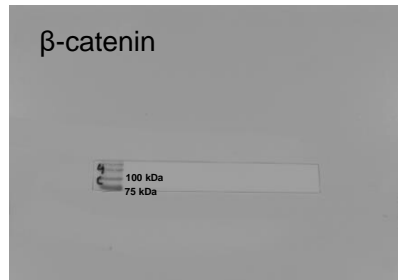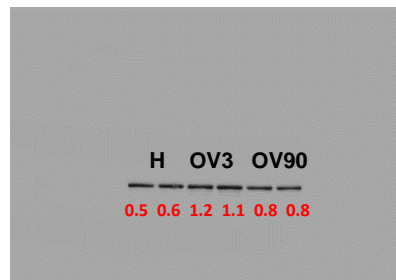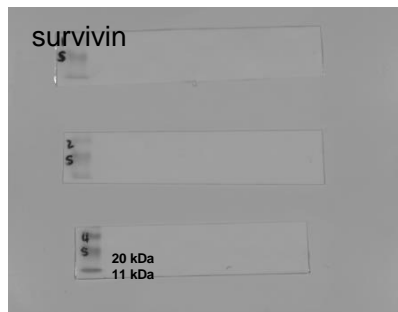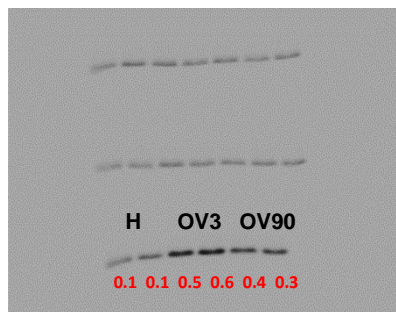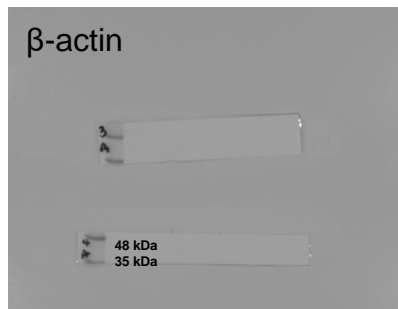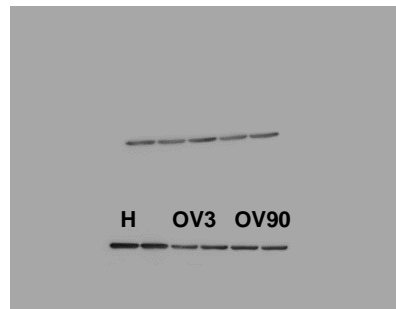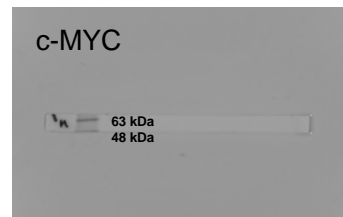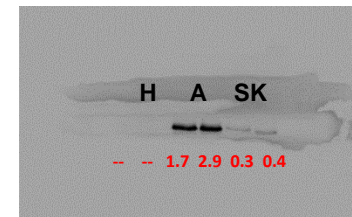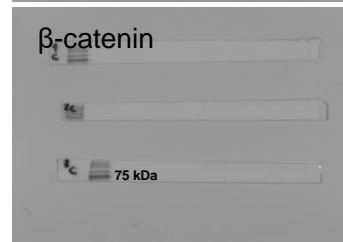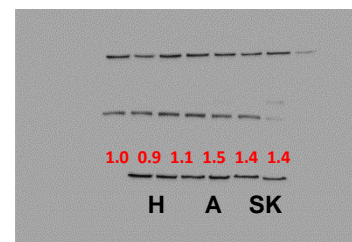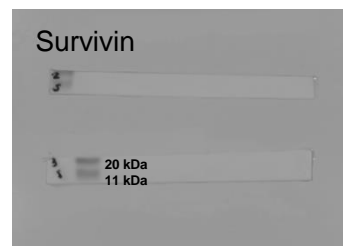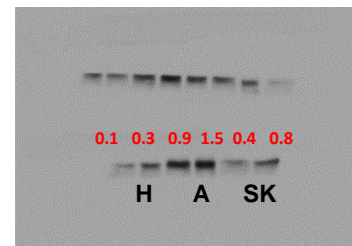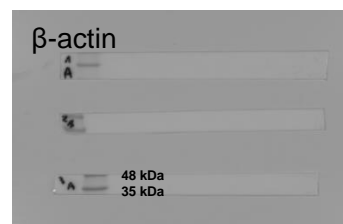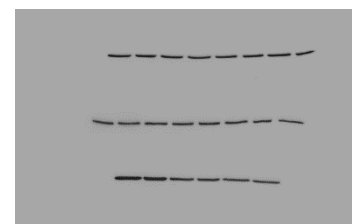

OV3: OV3 cell line  
H: HOSE cell line  
A: A2780 cell line  
SK: SKOV3 cell line

In red: protein/ $\beta$ -actin ratio

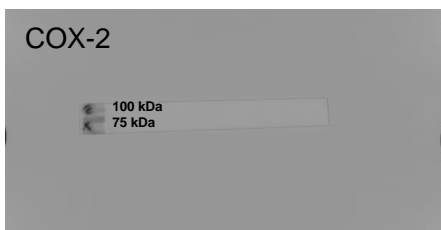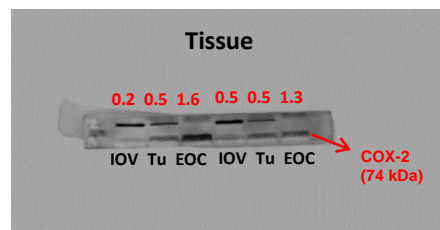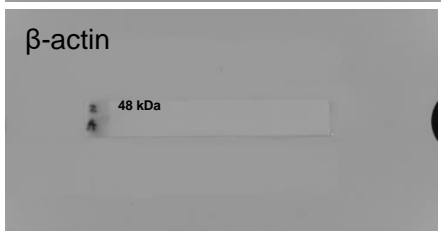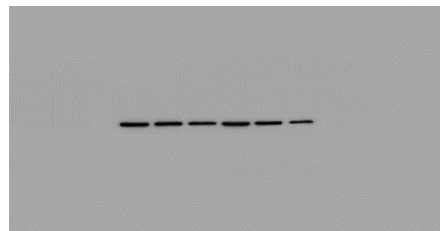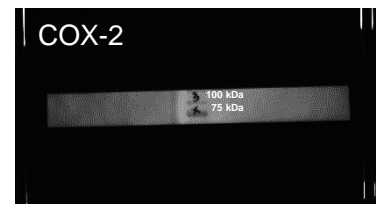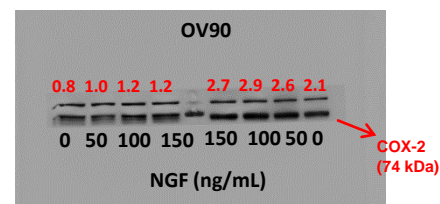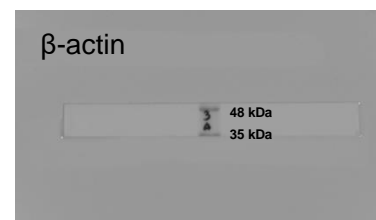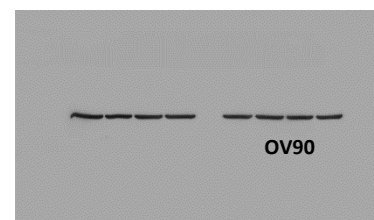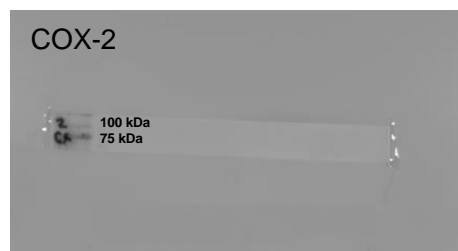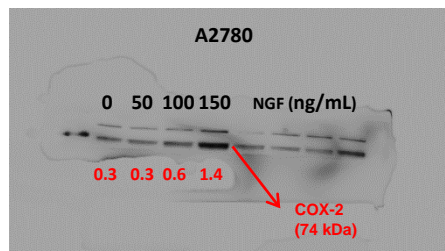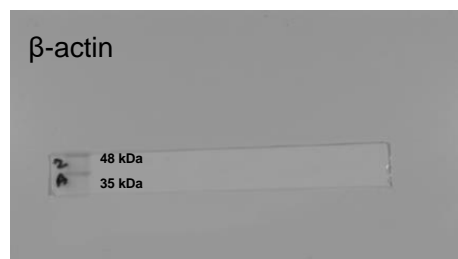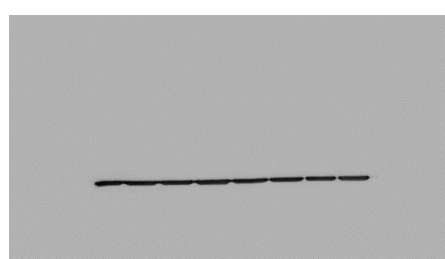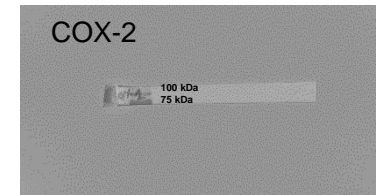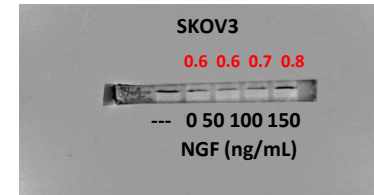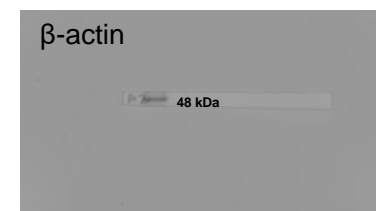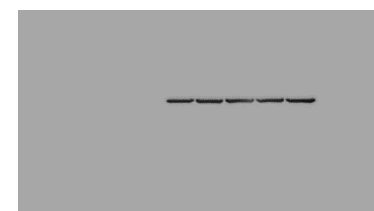

OV3: OVCAR3 cell line  
IOV: inactive ovary (non-tumoral)  
Tu: ovarian tumor  
EOC: epithelial ovarian cancer

In red: protein/β-actin ratio

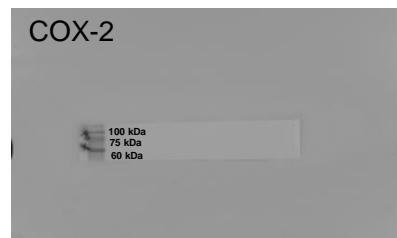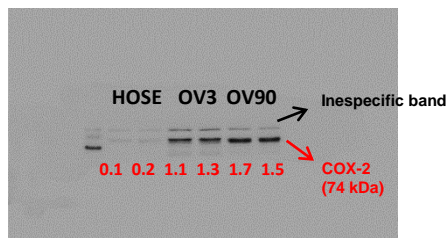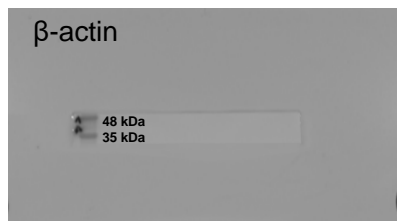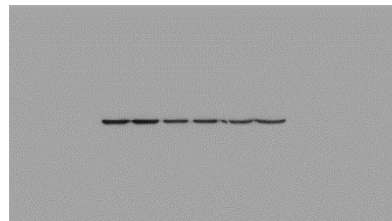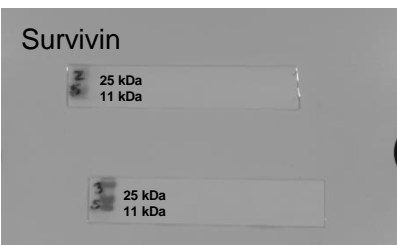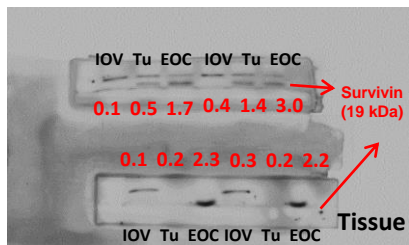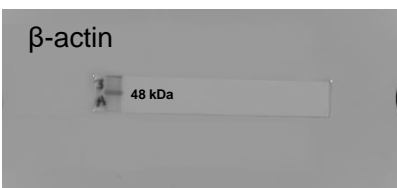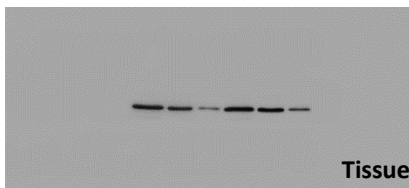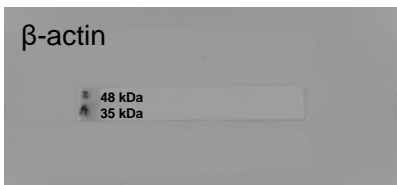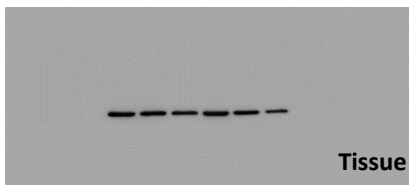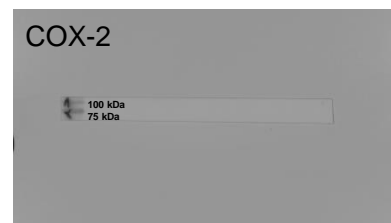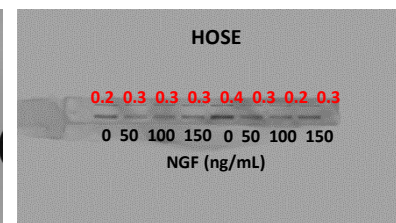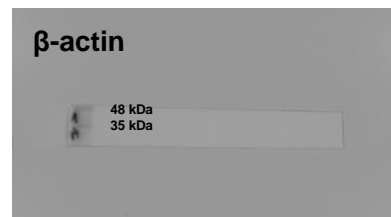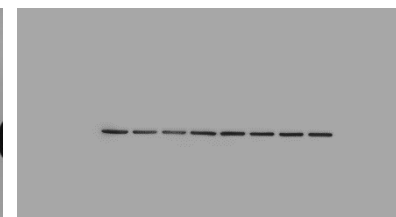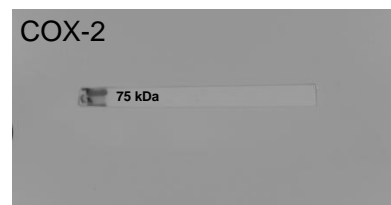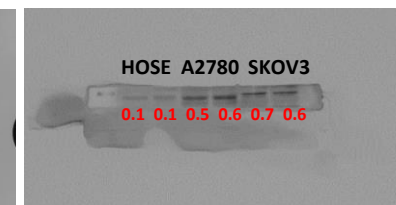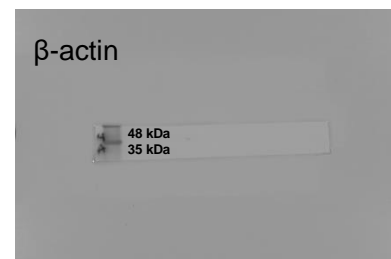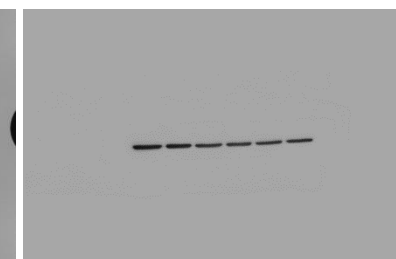

OV3: OVCAR3 cell line  
IOV: inactive ovary (non-tumoral)  
Tu: ovarian tumor  
EOC: epithelial ovarian cancer

In red: protein/ $\beta$ -actin ratio

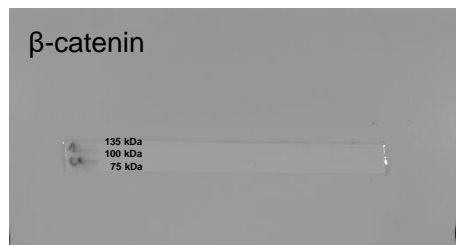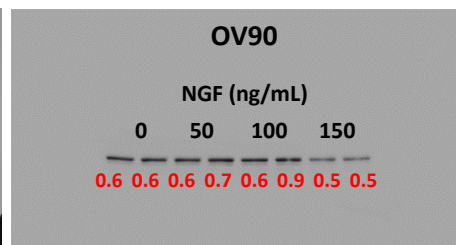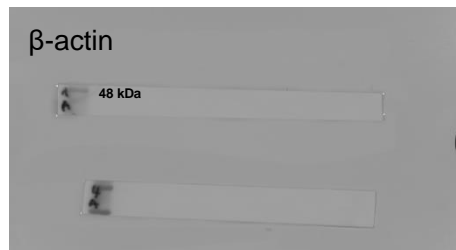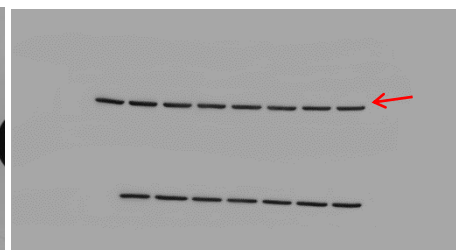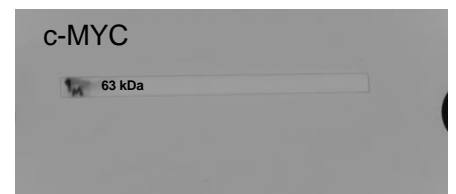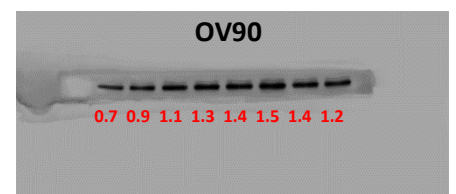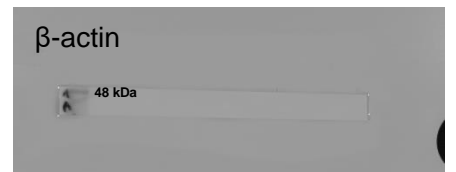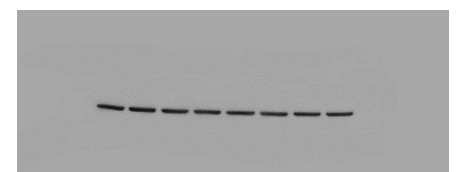

OV3: OVCAR3 cell line  
 IOV: inactive ovary (non-tumoral)  
 Tu: ovarian tumor  
 EOC: epithelial ovarian cancer

In red: protein/β-actin ratio

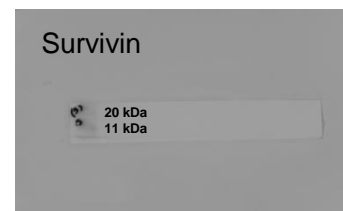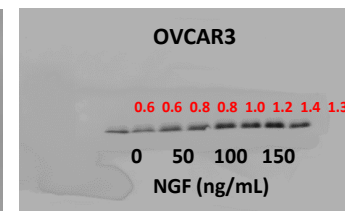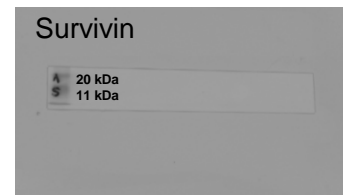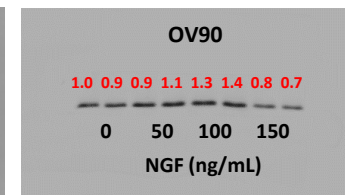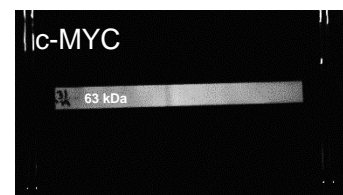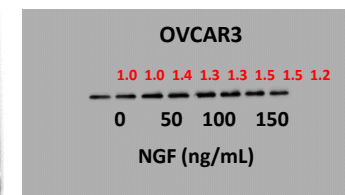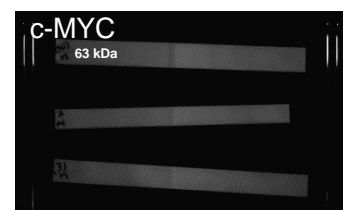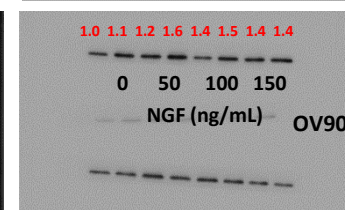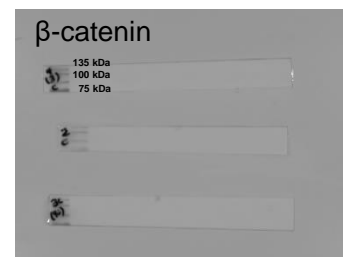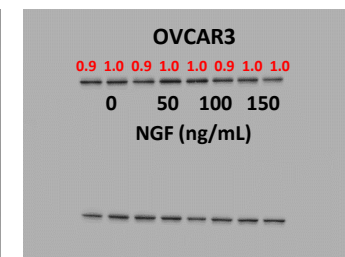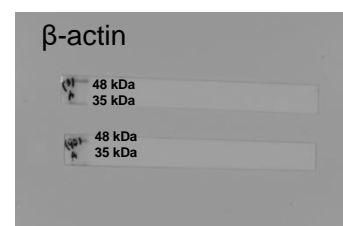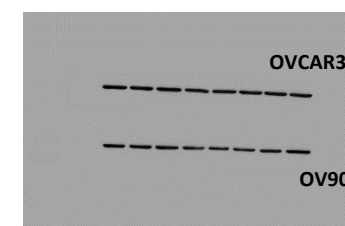



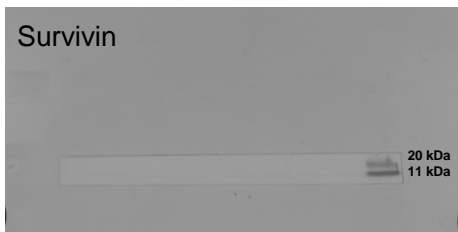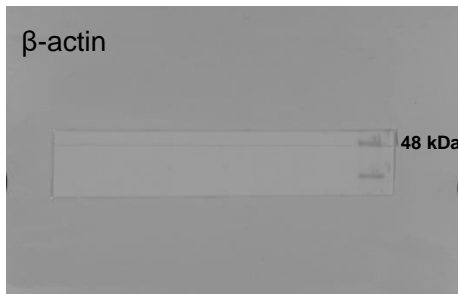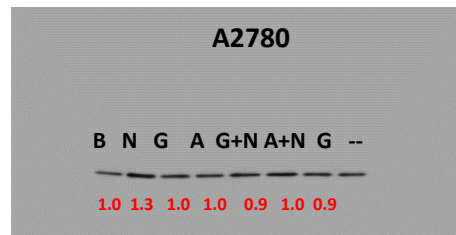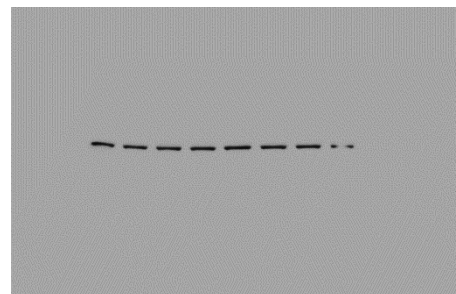

## A2780

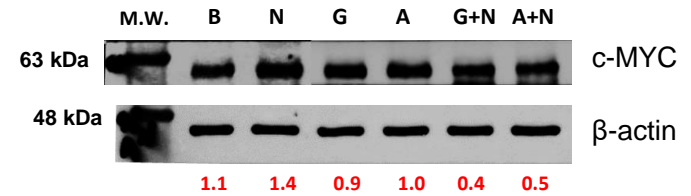

## HOSE

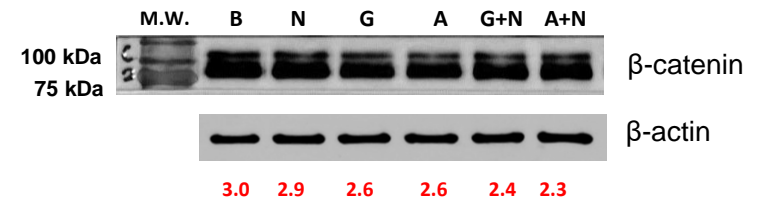

## A2780

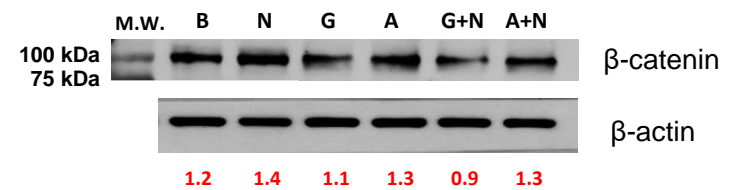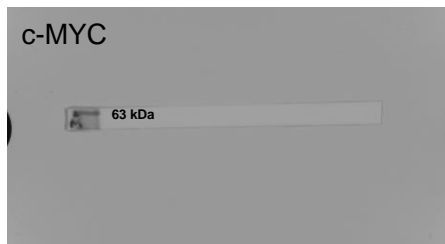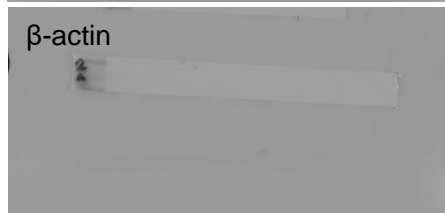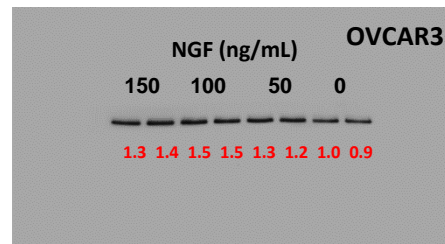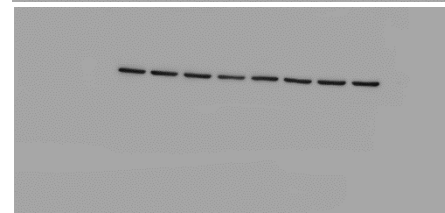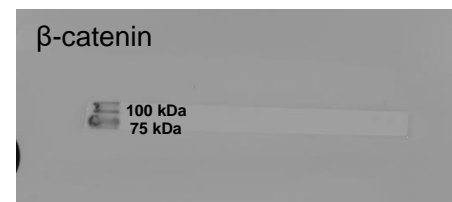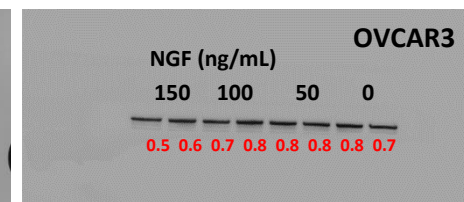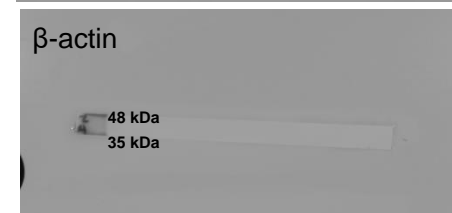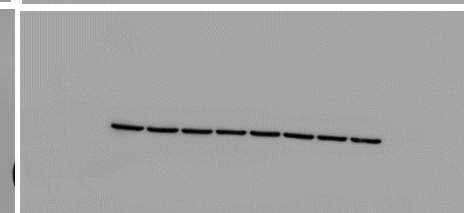

M.W.: molecular weight  
B: basal  
N: NGF  
G: GW441756 (trkA inhibitor)  
A: anti-NGF antibody

In red: protein/ $\beta$ -actin ratio

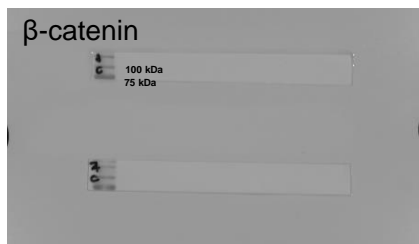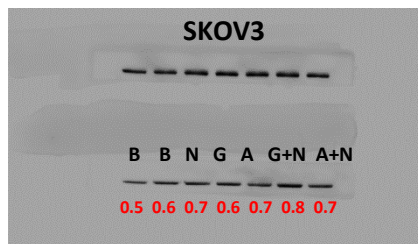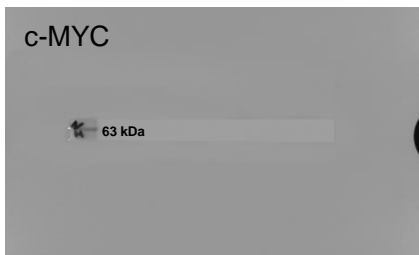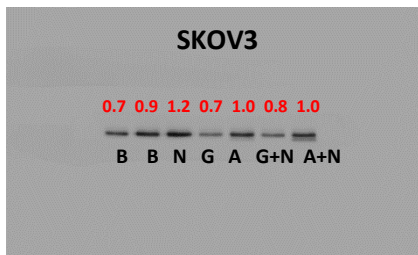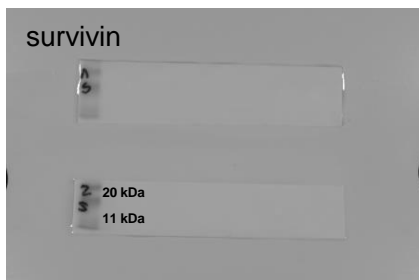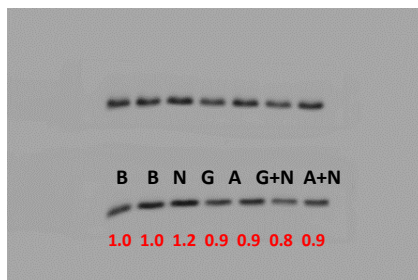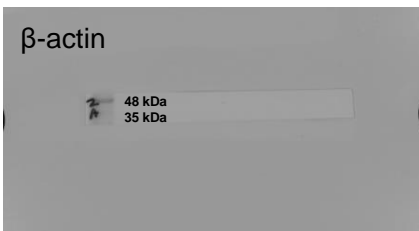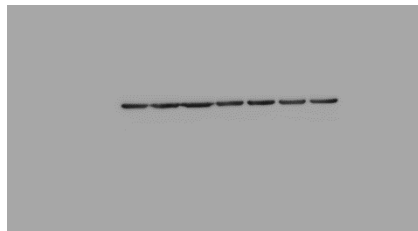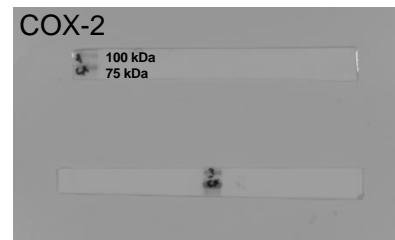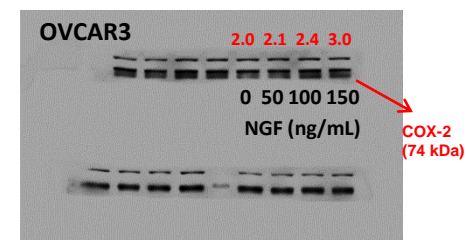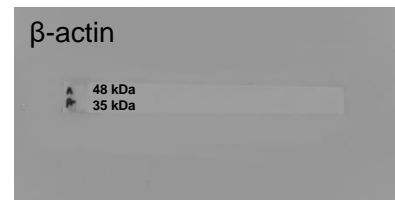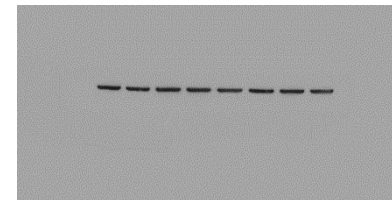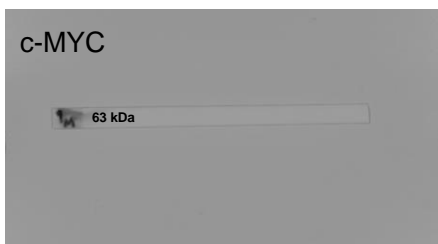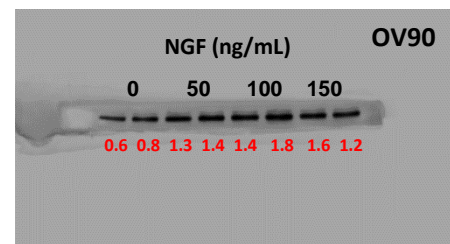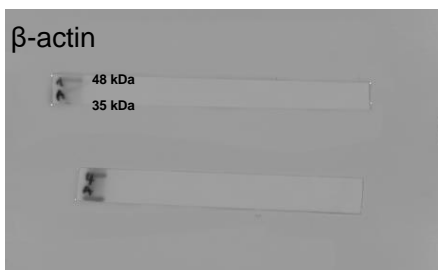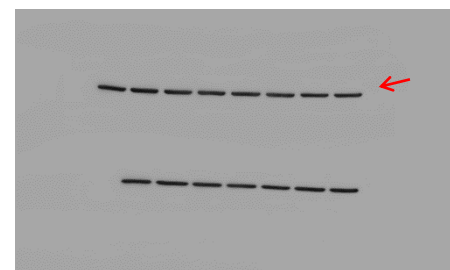

B: basal  
N: NGF  
G: GW441756 (trkA inhibitor)  
A: anti-NGF antibody

In red: protein/β-actin ratio

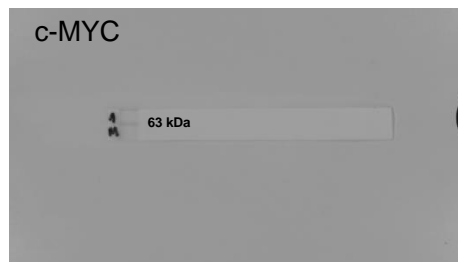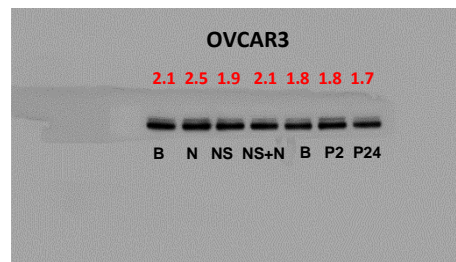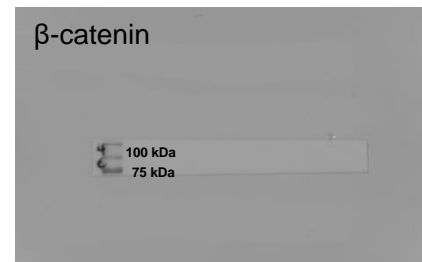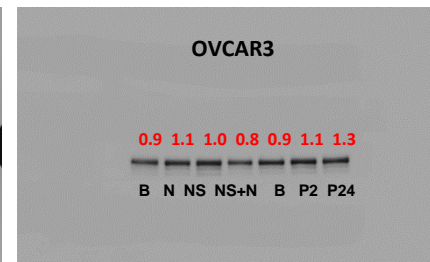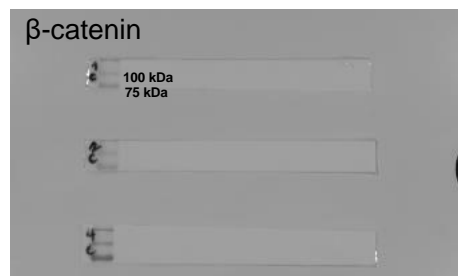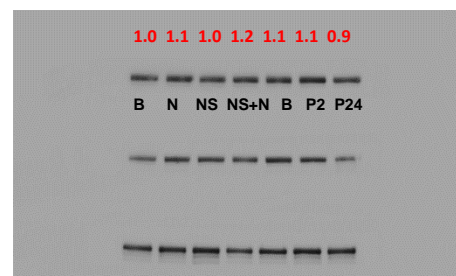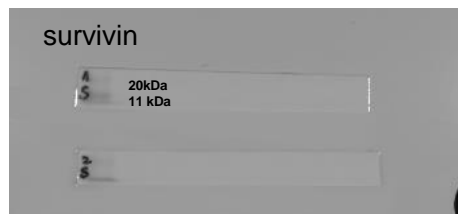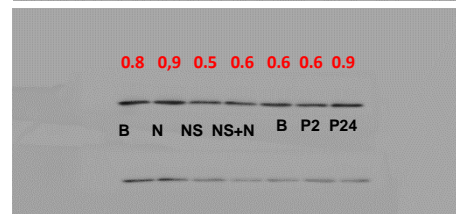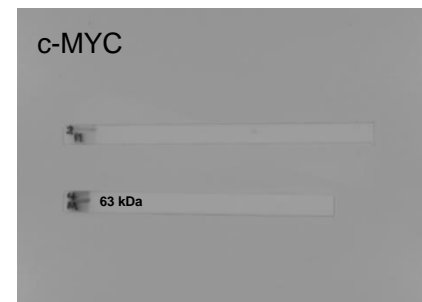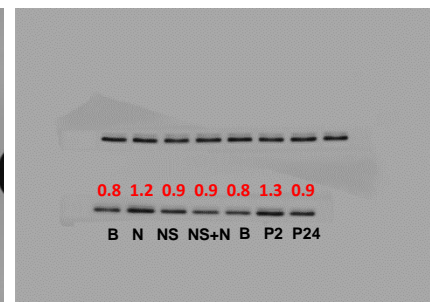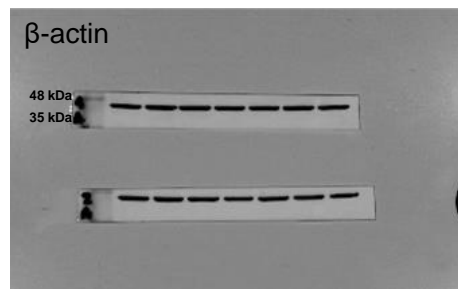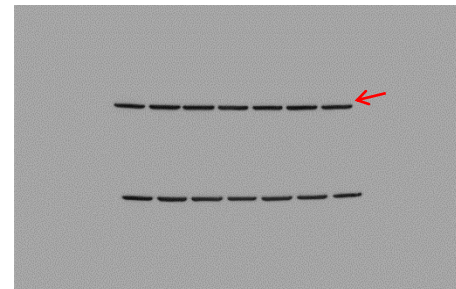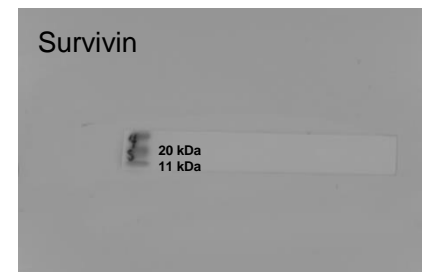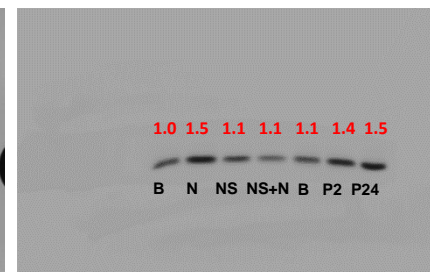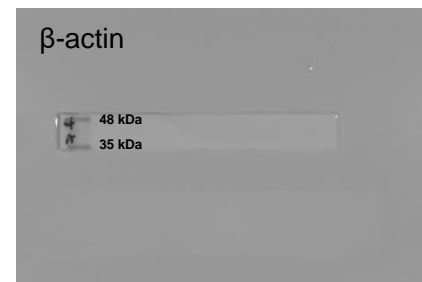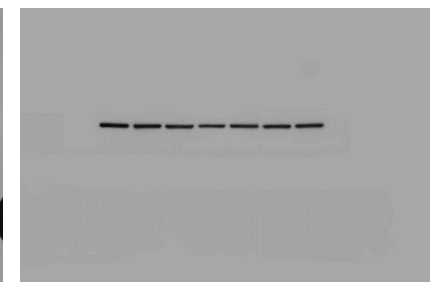

B: basal  
N: NGF  
NS: NS398 (COX-2 inhibitor)  
P: PGE2 (2 or 24h)

In red: protein/β-actin ratio



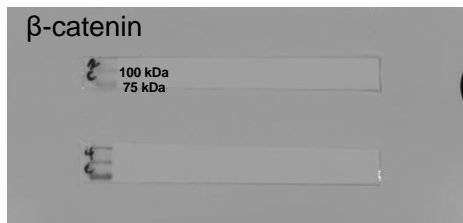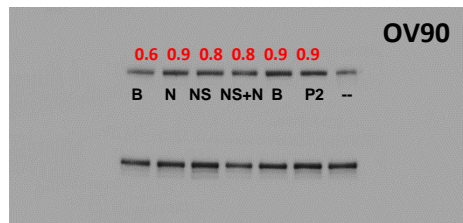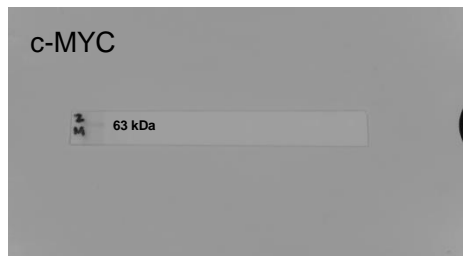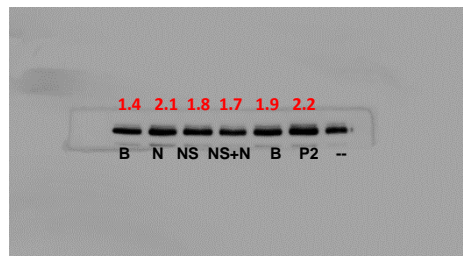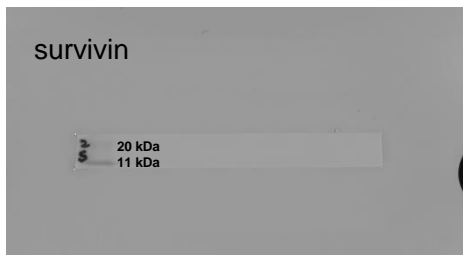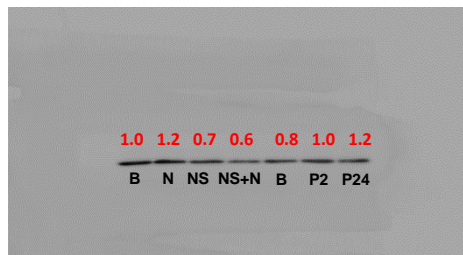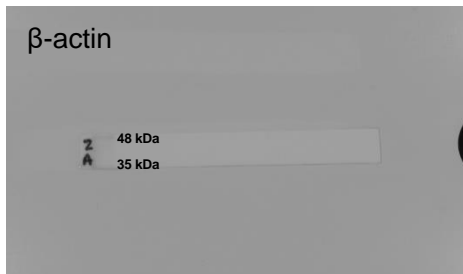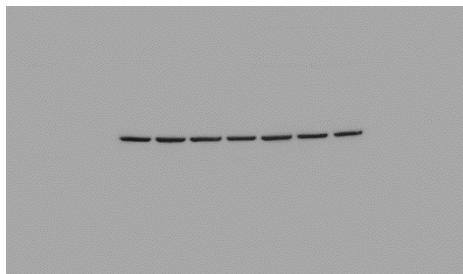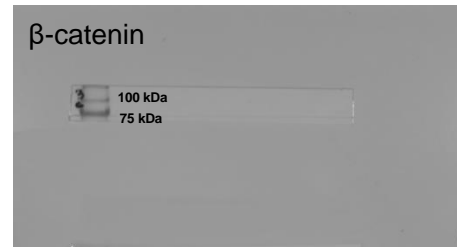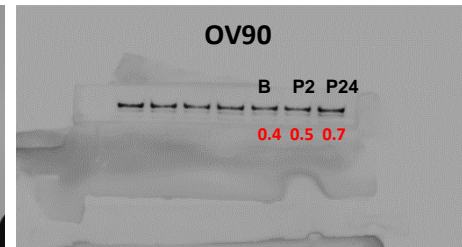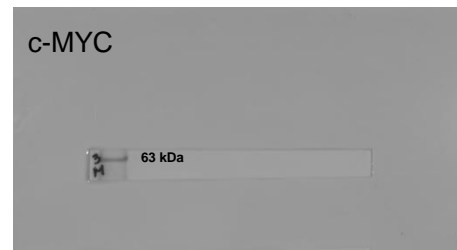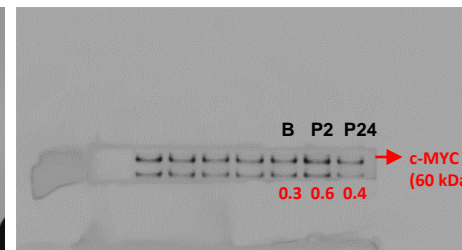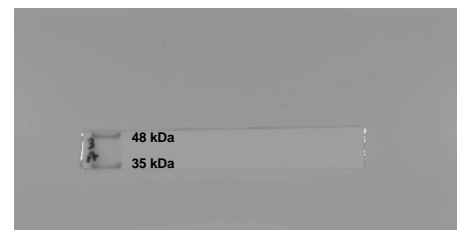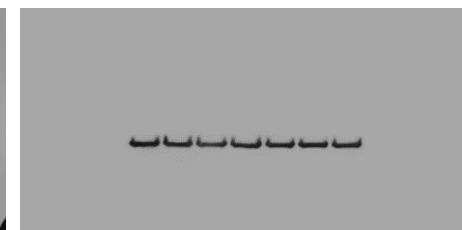

B: basal  
N: NGF  
NS: NS398 (COX-2 inhibitor)  
P: PGE2 (2 or 24h)

In red: protein/β-actin ratio

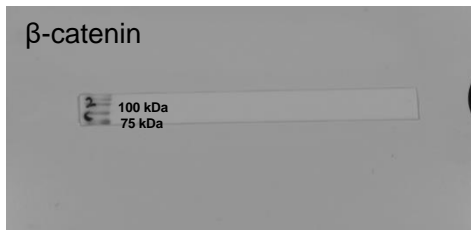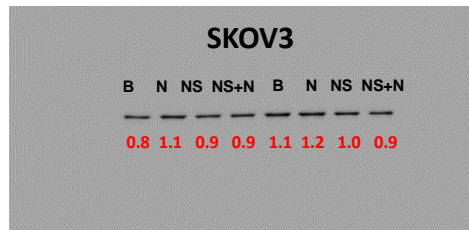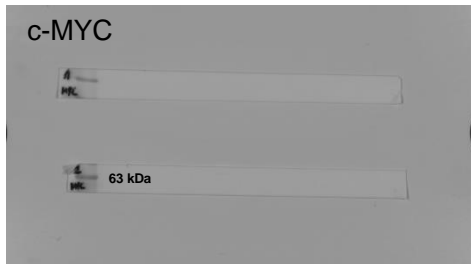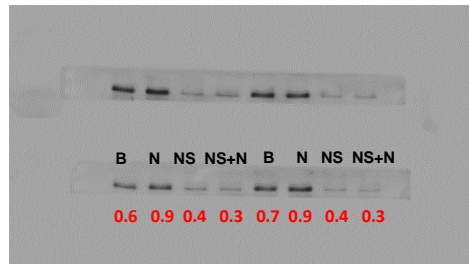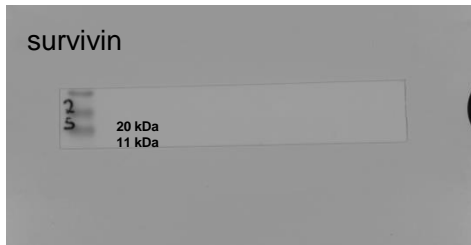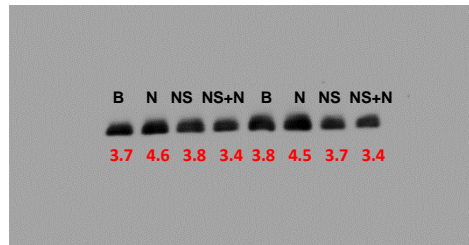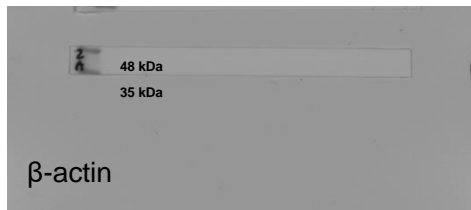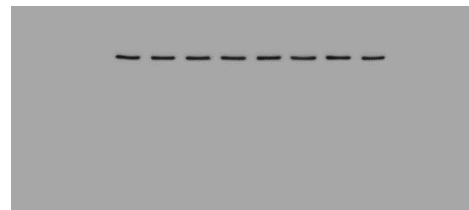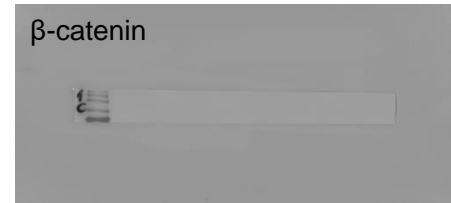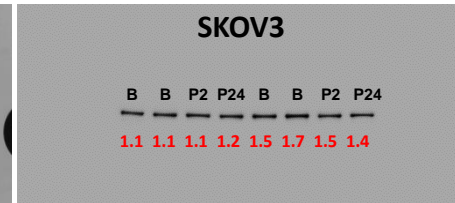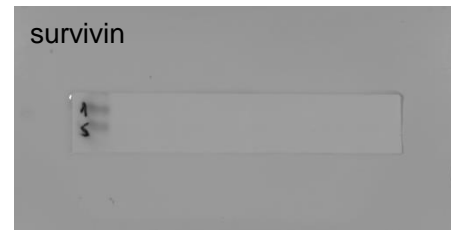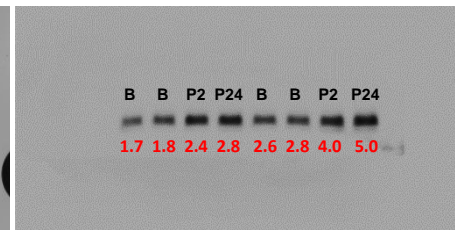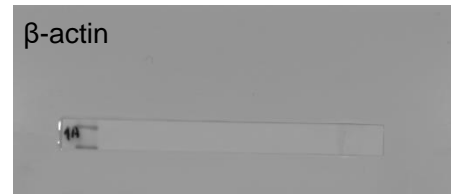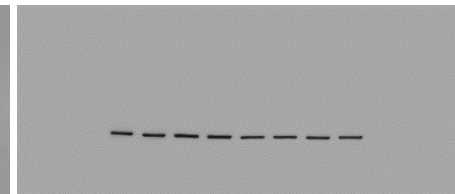

B: basal  
N: NGF  
NS: NS398 (COX-2 inhibitor)  
P: PGE2 (2 or 24h)

In red: protein/β-actin ratio

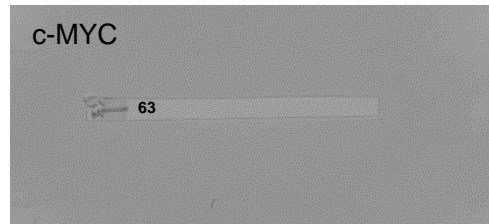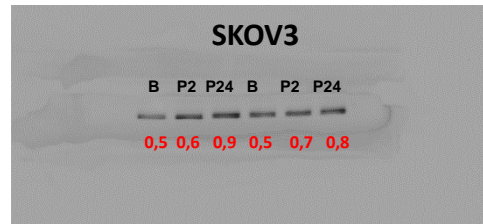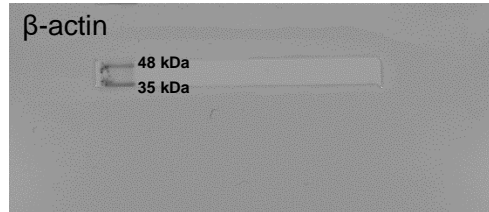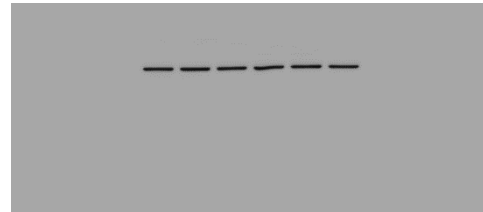

## A2780

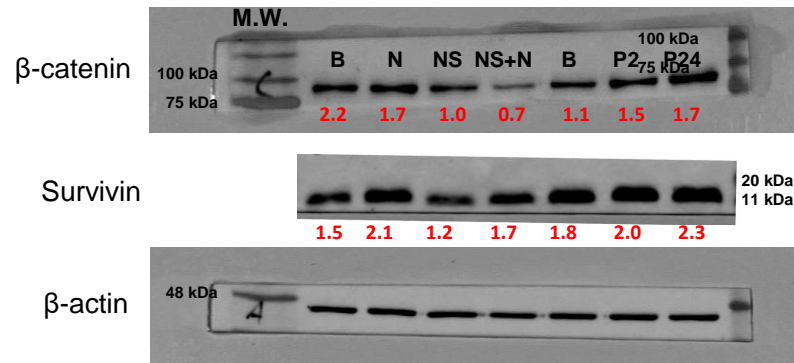

B: basal  
N: NGF  
NS: NS398 (COX-2 inhibitor)  
P: PGE2 (2 or 24h)

In red: protein/β-actin ratio

## A2780

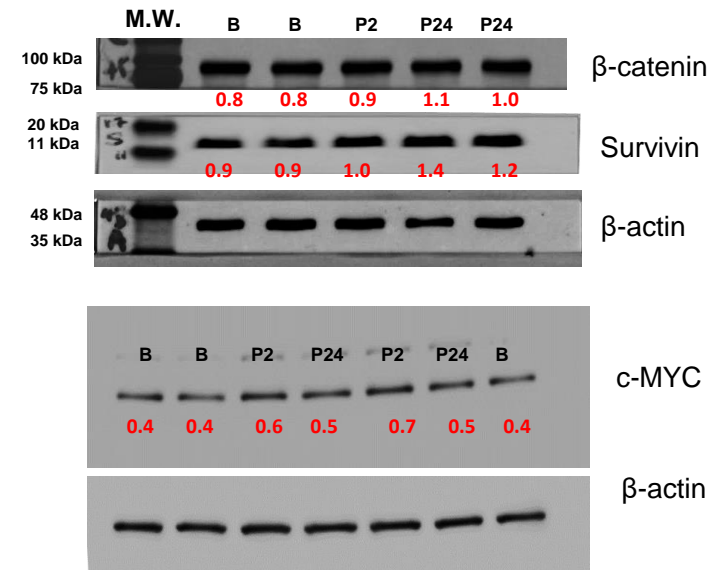

Supplement: s1 [file s1]
