# Supplementary material for: NGF-Enhanced Vasculogenic Properties of Epithelial Ovarian Cancer Cells Is Reduced by Inhibition of the COX-2/PGE2 Signaling Axis
Source: MDPI journal article supplement (doi:10.3390/cancers11121970), 2019-12-07
Supplement: s1 [file s1]

# Supplementary Materials: NGF-Enhanced Vasculogenic Properties of Epithelial Ovarian Cancer cells is Reduced by Inhibition of the COX-2/PGE<sub>2</sub> Signaling Axis

Maritza P. Garrido, Iván Hurtado, Manuel Valenzuela, Renato Salvatierra, Andrea Hernández, Margarita Vega, Alberto Selman, Andrew F.G. Quest and Carmen Romero

**Table S1.** Primer sequences used for traditional and real time PCR.

| Gene       | Primers                                                                                             | Application     | Amplicon | Seq         |
|------------|-----------------------------------------------------------------------------------------------------|-----------------|----------|-------------|
| COX-2      | Sense: 5'-TTC AAA GAG ATT GTG GGA AAA TTG CT-3'<br>Antisense: 5'-AGA TCA TCT CTG CCT GAG TAT CTT-3' | Traditional PCR | 303 pb   | NM_000963.3 |
| Survivin   | Sense: 5'-CTG GCA GCC CTT TCT CAA GGA-3'<br>Antisense: 5'-GCA ACC GGA CGA ATG CTT TT-3              | Real-time PCR   | 225 pb   | NM_001168.2 |
| GAPDH      | Sense: 5'-GAG TCA ACG GAT TTG GTC GT-3'<br>Antisense: 5'-ATC CAC AGT CTT CTG GGT G-3'               | Traditional PCR | 547 pb   | NM_002046.6 |
| beta-actin | Sense: 5'- TGGCAC CCA GCA CAA TGA AGA -3'<br>Antisense: 5'GAA GCA TTT GCG GTG GAC GAT 3'            | Real-time PCR   | 166 bp   | NM_001101.4 |

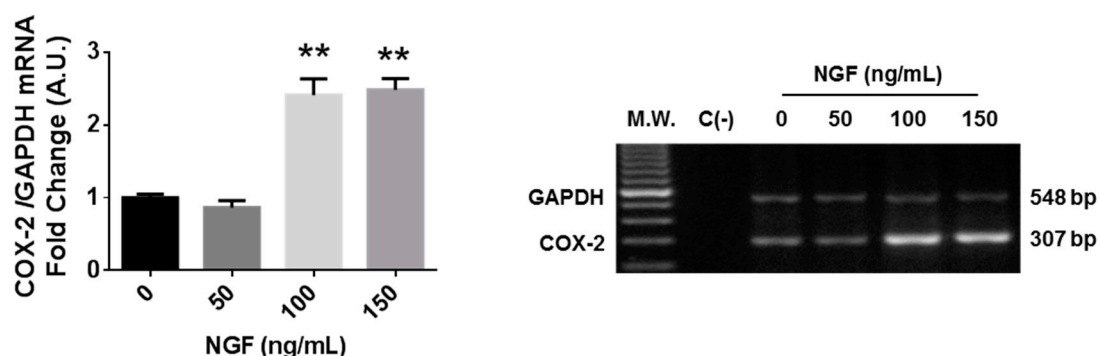

**Figure S1.** NGF increases COX-2 mRNA in EOC cells. A2780 cells were stimulated with NGF (50, 100 and 150 ng/mL) for 2 h and then analyzed by RT-PCR. Left: semi-quantification of COX-2 mRNA. Right: Representative image of COX-2 products in an agarose gel.  $n = 4$ . C: negative control. MW: molecular weight. \*\* =  $p < 0.01$  with respect to basal condition. Statistical analysis: Kruskal Wallis test and Dunn's post-test. Results are expressed as the mean  $\pm$  standard error of the mean (SEM).

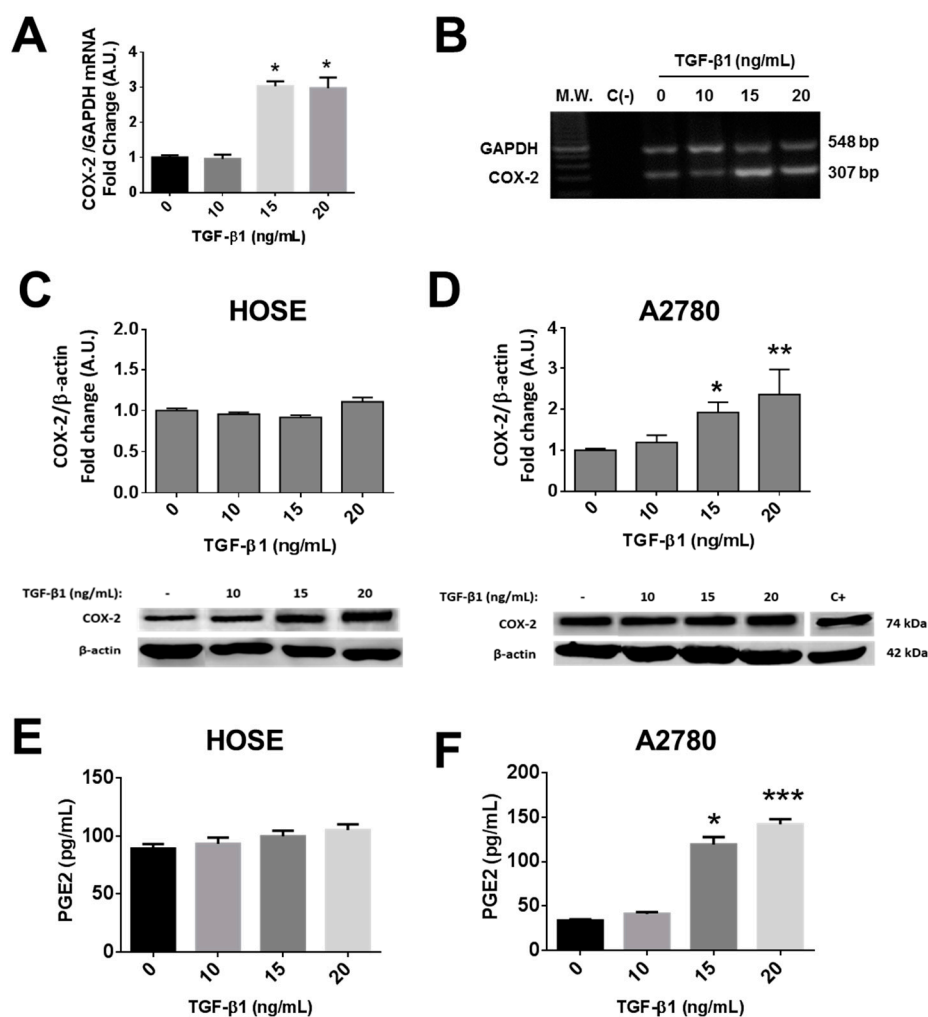

**Figure S2.** EOC cells respond to TGF- $\beta$  stimulation increasing COX-2 and PGE<sub>2</sub>. The ovarian cell lines HOSE and A2780 were stimulated with TGF- $\beta$  (10, 15 and 20 ng/mL) for 2 h. (A): Semi-quantitative analysis of COX-2 mRNA levels induced by TGF- $\beta$  stimulation. (B): A representative image of COX-2 products in an agarose gel. MW: molecular weight standard. C: negative control. (C–D): COX-2 protein levels induced by TGF- $\beta$  stimulation in HOSE and A2780 cells evaluated by Western blotting. C+: extract from HEK cells that overexpress COX-2 was employed as a positive control. (E–F): PGE<sub>2</sub> levels in the culture supernatants of HOSE and A2780 cells, respectively, after TGF- $\beta$  stimulation.  $n = 4$ . \* =  $p < 0.05$ , \*\* =  $p < 0.01$  and \*\*\* =  $p < 0.001$  as indicated or with respect to basal condition. Statistical analysis: Kruskal Wallis test and Dunn's post-test. Results are expressed as the mean  $\pm$  standard error of the mean (SEM).

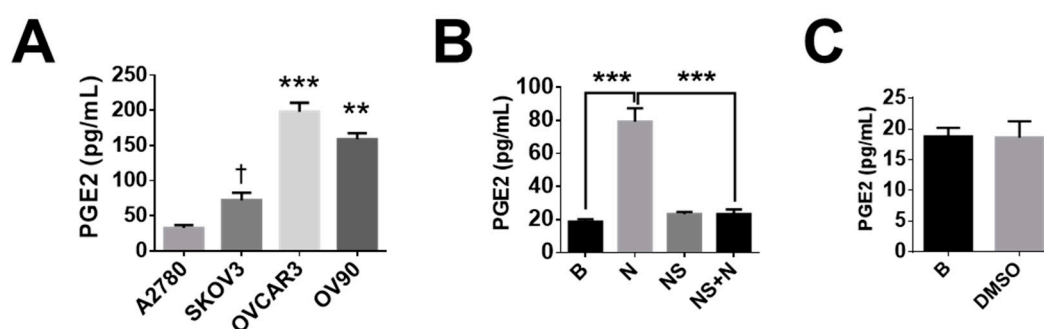

**Figure S3.** PGE<sub>2</sub> levels in media from different EOC cells before and after COX-2 inhibition. (A): Basal PGE<sub>2</sub> in the EOC cell lines A2780, SKOV3, OVCAR3 and OV90. \*\* =  $p < 0.01$  and \*\*\* =  $p < 0.001$  respect

to A2780 (Kruskal Wallis test and Dunn's post-test).  $\dagger = p < 0.05$  respect to A2780 (Mann Whitney test). (B): A2780 cells were treated with the COX-2 inhibitor (NS, 20  $\mu$ M) for 24 h and stimulated with NGF (N, 150 ng/mL) during the last 2 h. PGE<sub>2</sub> was measured in culture supernatants. (C): PGE<sub>2</sub> in culture supernatants of A2780 cells under basal conditions (B, without stimuli) or treated with DMSO (NS vehicle).  $n = 4$  or more. \*\*\* =  $p < 0.001$  as indicated. Statistical analysis: Kruskal Wallis test and Dunn's post-test. Results were expressed as mean  $\pm$  standard error of the mean (SEM).

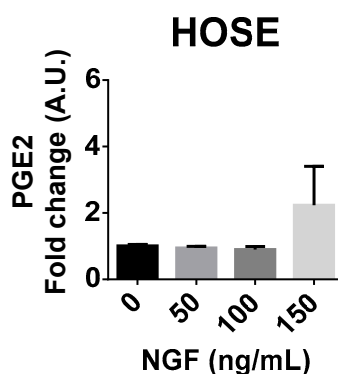

**Figure S4.** PGE<sub>2</sub> levels after NGF stimulation of HOSE cells. HOSE cells were stimulated with NGF (50, 100 and 150 ng/mL) for 2 h and PGE<sub>2</sub> was measured in the culture supernatants by ELISA.

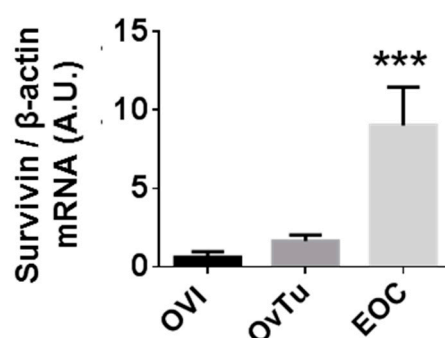

**Figure S5.** mRNA levels of survivin during EOC progression. Survivin mRNA was obtained from ovarian epithelium of inactive ovaries (OVI,  $n = 4$ ), benign tumor (BeT,  $n = 5$ ), borderline tumor (BorT,  $n = 6$ ) and either well (EOC I,  $n = 2$ ), moderately (EOC II,  $n = 5$ ) or poorly differentiated (EOC III,  $n = 8$ ) ovarian cancers. Then, samples were analyzed by real time PCR. \*\*\* =  $p < 0.01$  vs. OVI. Statistical analysis: Kruskal Wallis test and Dunn's post-test. Results are expressed as the mean  $\pm$  standard error of the mean (SEM).

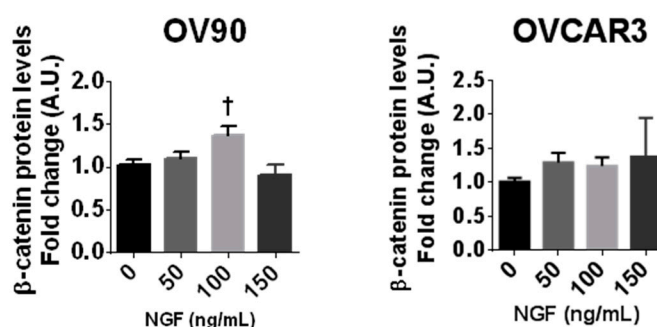

**Figure S6.** Effect of NGF on  $\beta$ -catenin protein levels in EOC cells. OV90 and OVCAR3 cells were serum-deprived for 24 h and then stimulated with NGF (0, 50, 100 and 150 ng/mL) for 8 h.  $n = 4$  or more.  $\dagger = p < 0.05$  with respect to the basal condition (Mann Whitney test).

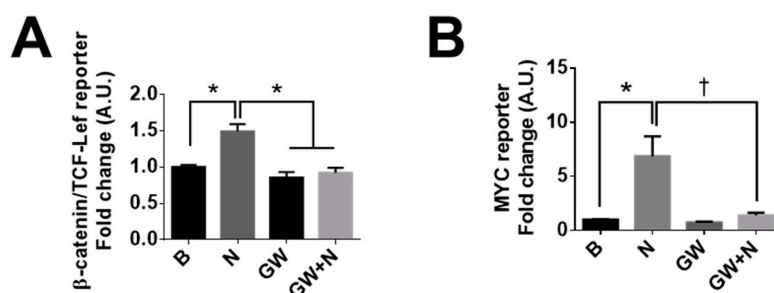

**Figure S7.**  $\beta$ -catenin/TCF-Lef and MYC transcriptional activity in A2780 cells.  $\beta$ -catenin/TCF-Lef (A) and MYC transcriptional activity (B) were measured in gene-reporter assays as described. B = basal condition (without stimuli), N = NGF (100 ng/mL), GW: GW441756 (specific TRKA inhibitor).  $n = 4$  or more. \* =  $p < 0.05$  (Kruskal Wallis test and Dunn's post-test) and † =  $p < 0.05$  (Mann Whitney test) as indicated. Results are expressed as the mean  $\pm$  standard error of the mean (SEM).

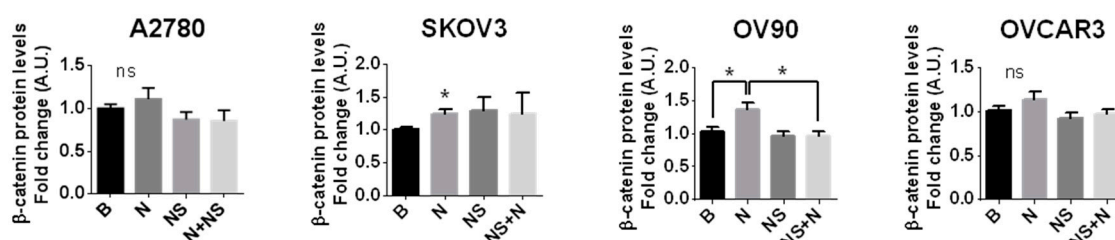

**Figure S8.**  $\beta$ -catenin protein levels after NGF stimulation and NS398 treatment of EOC cells. EOC cells were treated with the specific COX-2 inhibitor (NS, 20  $\mu$ M, 24 h) and/or NGF (N; 150 ng/mL for 2h in SKOV3 cells; 100 ng/mL for 8 h in OV90 cells and 150 ng/mL for 8 h in OVCAR3 cells) and  $\beta$ -catenin levels were then assessed by western blotting and scanning densitometry.  $n = 4$  or more. \* =  $p < 0.05$  with respect to basal condition (B, without stimuli). Statistical analysis: Kruskal Wallis test and Dunn's post-test. Results are expressed as the mean  $\pm$  standard error of the mean (SEM).

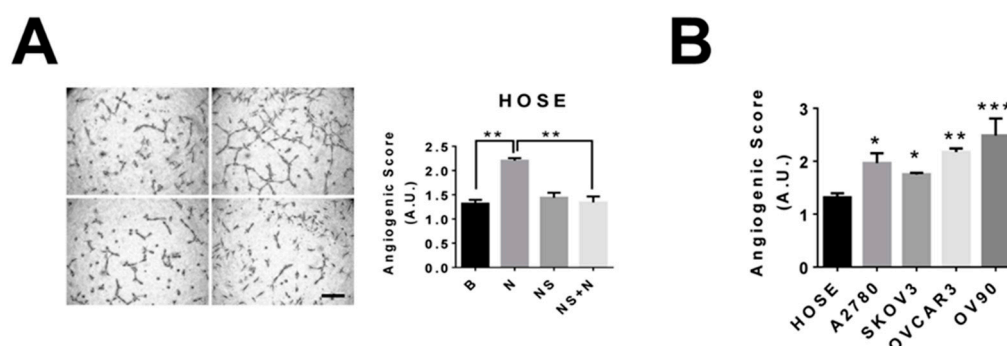

**Figure S9.** Angiogenic score of HOSE cells after NGF stimulation and NS treatment. (A): HOSE cells were stimulated with NGF (N, 100 ng/mL, 2h) and/or treated with the specific COX-2 inhibitor (NS, 20  $\mu$ M, 24h). Then, culture supernatants were employed in tubule formation assays in matrigel using endothelial cells. Bar = 100  $\mu$ m (B): basal angiogenic score of the different cell lines used. \* =  $p < 0.05$  and  $p < 0.01$  with respect to the basal condition (without stimuli) or as indicated. Statistical analysis: Kruskal Wallis test and Dunn's post-test. Results are expressed as the mean  $\pm$  standard error of the mean (SEM).

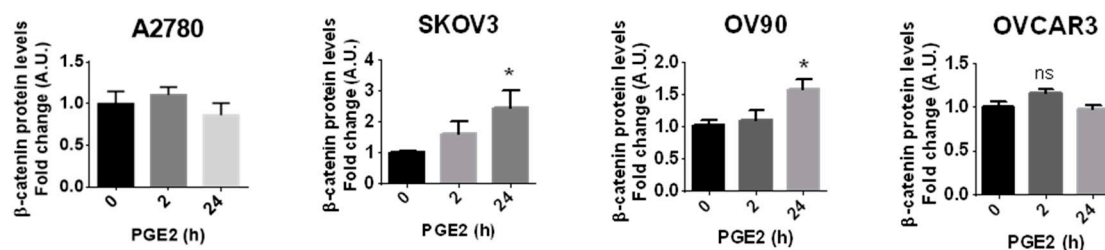

**Figure S10.** β-catenin protein levels after PGE<sub>2</sub> stimulation of EOC cells. EOC cells were serum-deprived for 24 h and then stimulated with PGE<sub>2</sub> (20 μM, 2 and 24 h). β-catenin levels were assessed by western-blotting and scanning densitometry.  $n = 4$  or more. \* =  $p < 0.05$  with respect to the basal condition (without stimuli). ns: statistically not significant. Statistical analysis: Kruskal Wallis test and Dunn's post-test. Results are expressed as the mean ± standard error of the mean (SEM).

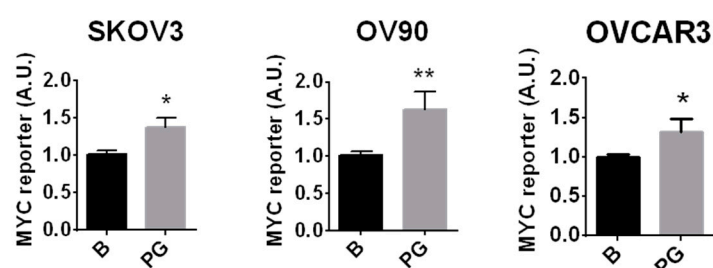

**Figure S11.** PGE<sub>2</sub> increases MYC transcriptional activity in EOC cells. EOC cells were incubated with PGE<sub>2</sub> (PG, 20 μM) for 24 h and reporter activity was measured.  $n = 4$ , \* =  $p < 0.05$  and  $p < 0.01$  (Mann Whitney test). Results are expressed as the mean ± standard error of the mean (SEM).

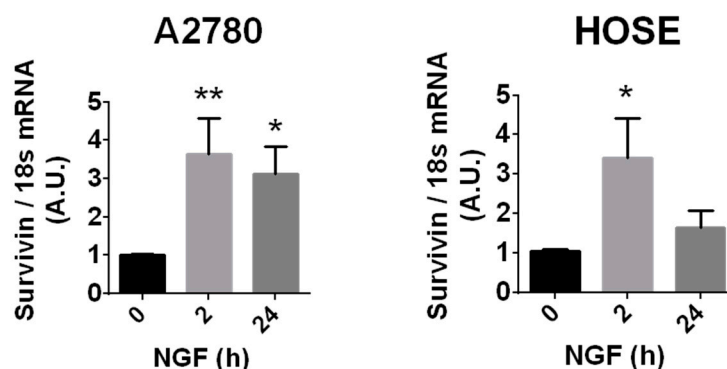

**Figure S12.** Survivin mRNA post- NGF stimulation in ovarian cells. A2780 and HOSE cells were stimulated with NGF (100 ng/mL, 2 or 24 h) and survivin mRNA was detected by qPCR.  $n = 4$  independent experiments in duplicate. \*\* =  $p < 0.01$  and \*\*\* =  $p < 0.001$ . Statistical analysis: Kruskal Wallis test and Dunn's post-test. Results are expressed as the mean ± standard error of the mean (SEM).

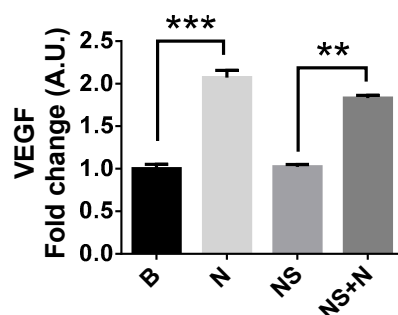

**Figure S13.** Effect of COX-2 inhibition for short periods of time on VEGF liberation by EOC cells. A2780 cells were incubated with the COX-2 specific inhibitor (NS, 20  $\mu$ M) and stimulated with NGF (N, 150 ng/mL) for 2 h. Then, VEGF protein levels in the culture supernatants were measured.  $n = 4$ . \*\* =  $p < 0.01$  and \*\*\* =  $p < 0.001$ . Statistical analysis: Kruskal Wallis test and Dunn's post-test. Results are expressed as the mean  $\pm$  standard error of the mean (SEM).

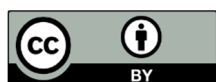

© 2019 by the authors. Licensee MDPI, Basel, Switzerland. This article is an open access article distributed under the terms and conditions of the Creative Commons Attribution (CC BY) license (<http://creativecommons.org/licenses/by/4.0/>).
